# Supplementary material
Source: publisher figshare collection journal article supplement (https://geolsoc.figshare.com/articles/dataset/_/3453014)

## Field Photos

- (a) Field photo showing the intrusion of granite into the diorites;
- (b) Field photo showing the intrusion of feldspathic veinlets into the diorites;
- (c) sketch geological map of the northern North China showing distribution of the Palaeozoic magmatic rocks

(modified after Zhang & Zhai, 2010)

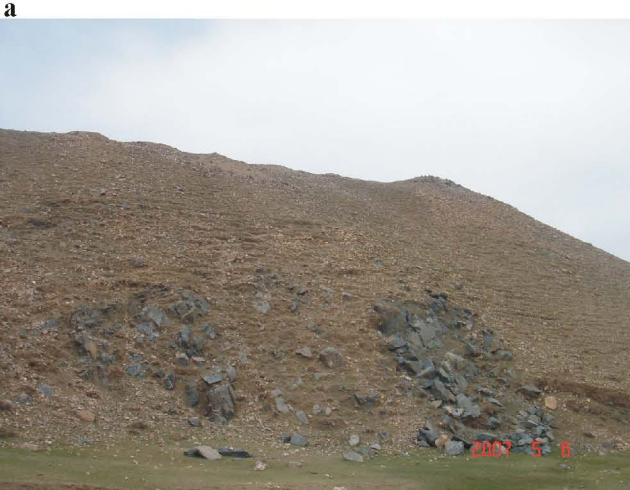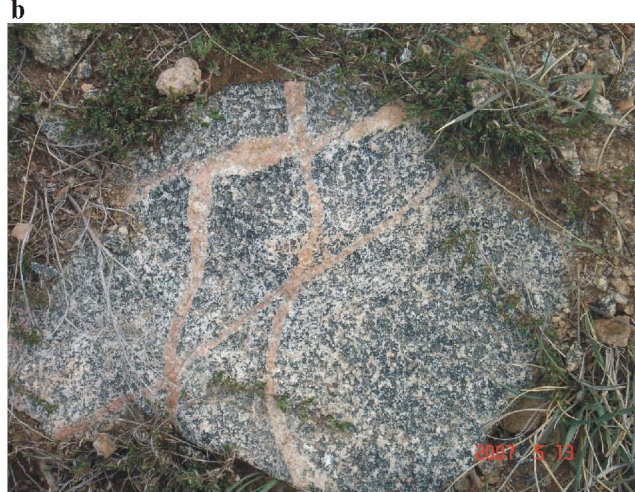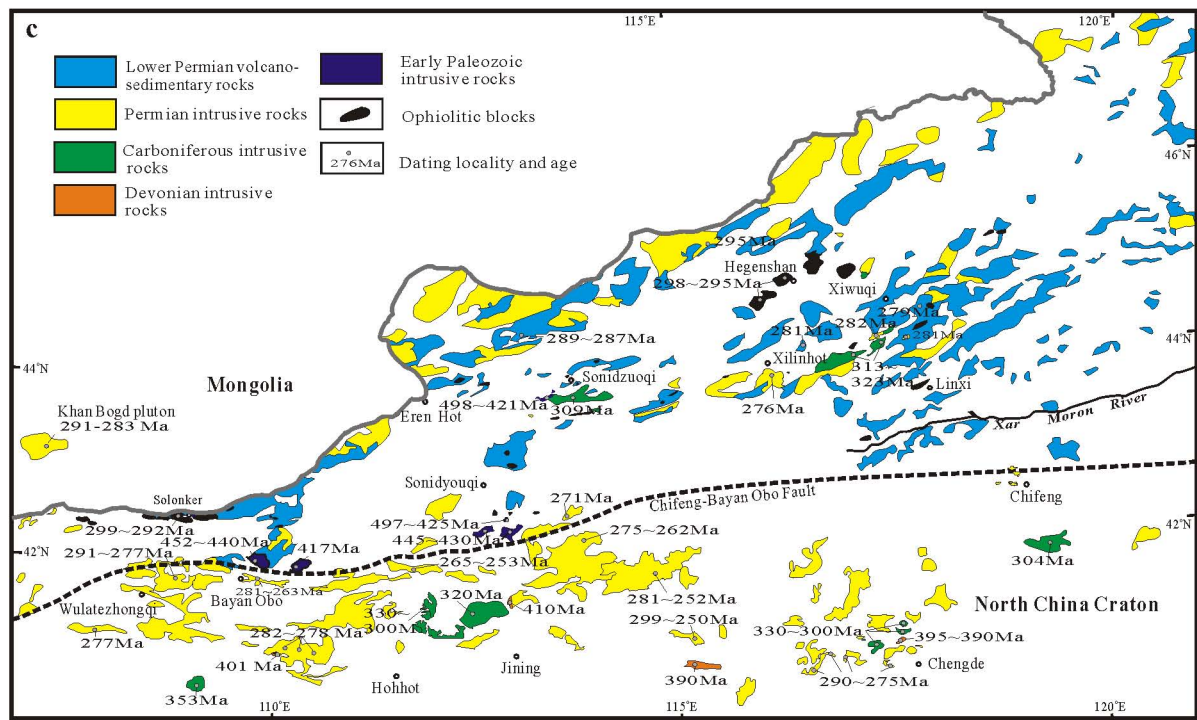

Supplement: Supplementary file 1 [file 1]
